# Supplementary material for: An essential role for Grk2 in Hedgehog signalling downstream of Smoothened
Source: PubMed Central journal article supplement — EMBO Rep. 2016 Apr 4;17(5):739–52. doi: 10.15252/embr.201541532 (PMC5341524; doi:10.15252/embr.201541532), 2016-04-04
Supplement: EMBR-17-739-s001.pdf [file EMBR-17-739-s001.pdf]

## Expanded View Figures

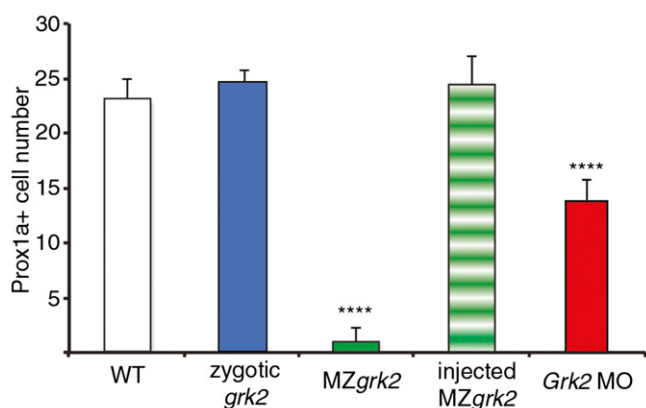

**Figure EV1. *MZgrk2* shows severe Hh defects.**

Numbers of Prox1a<sup>+</sup> cells in wild-type (WT), zygotic *grk2* mutants, *MZgrk2*, *MZgrk2* injected with Grk2-GFP and Grk2 ATG morphant embryos at 30hpf ( $n = 8$ ). The error bars indicate SD. Asterisks indicate statistically significant differences based on unpaired Student's *t*-test. \*\*\*\* $P < 0.0001$ .

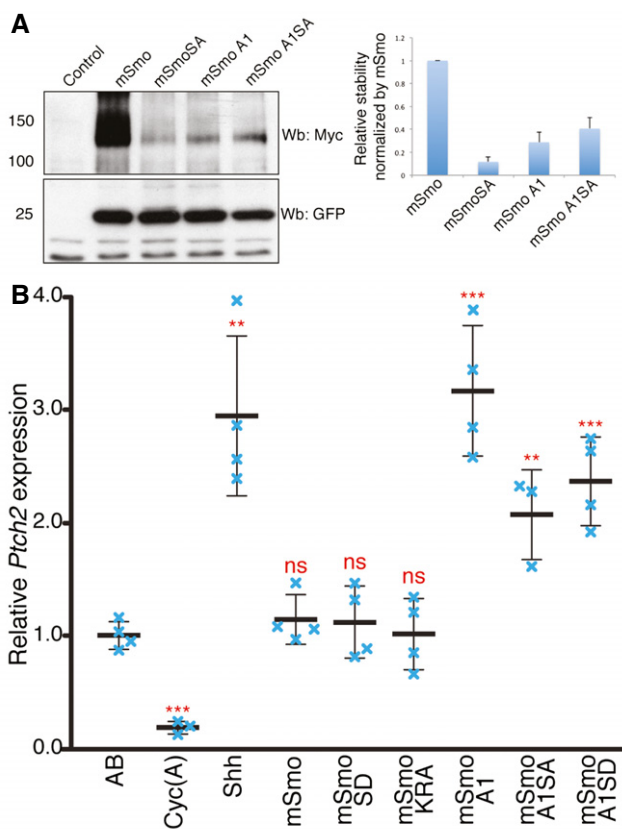

**Figure EV2. Phosphorylation and dimerisation of Smo does not impair or enhance Hh activity.**

**A** Western blot analysis of wild-type and mutant forms of Smo expressed from bicistronic myc-tagged mSmo and GFP constructs injected into wild-type zebrafish embryos. The histogram shows the quantification of Myc-tagged mSmo vs. GFP ( $n = 3$ ). The error bars indicate SD.

**B** Normalised expression of *ptch2* in 18hpf wild-type (AB), Cyc(A)-treated embryos and embryos injected with mRNA encoding Shh or various Smo mutants. Individual data points (blue crosses) are shown; mean is indicated by thick solid line, and SD by thin bars. Unpaired Student's *t*-test was used to determine the statistical significance between control (AB) and experimental embryos. \*\*\* $P < 0.001$ ; \*\* $P < 0.01$ ; and n.s. (not significant).

**C** Prox1a and Eng expression in *smo*<sup>hi1640</sup> mutant embryos injected with mRNA encoding mSmoSD ( $n = 7$ ) and mSmoKRA ( $n = 7$ ). These mutant embryos show full recovery of SSFs and MPs. Embryos shown are at 30hpf. Scale bar, 50  $\mu$ m.

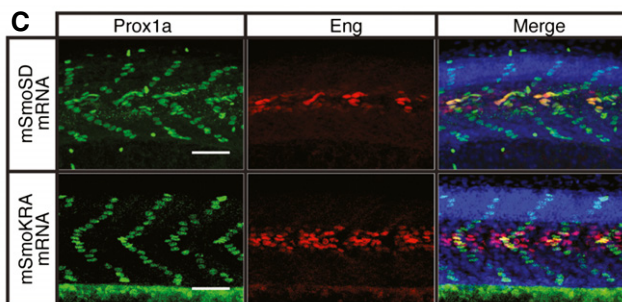

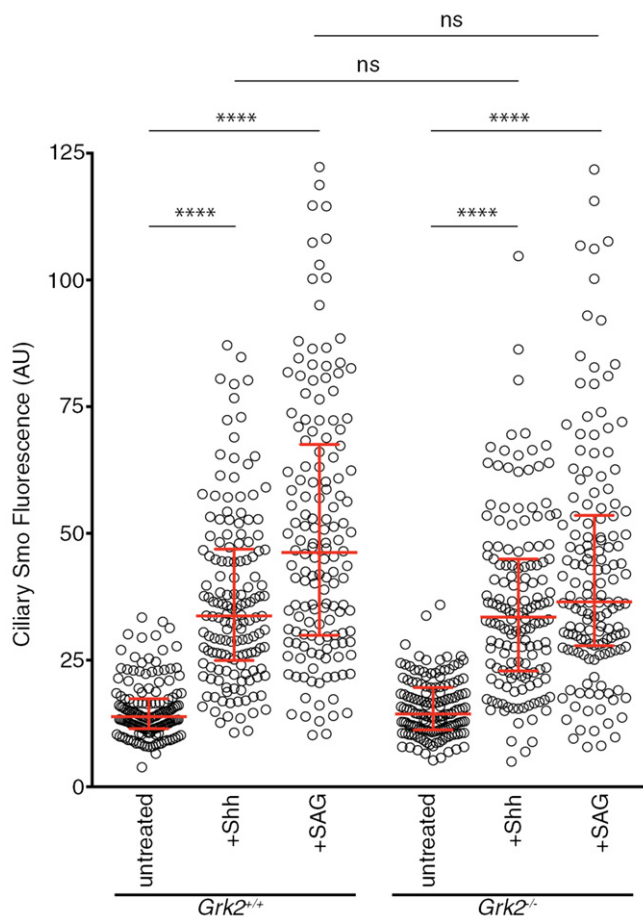

**Figure EV3. Smo translocates to the primary cilium independently of Grk2.**

Accumulation of endogenous Smo in the PC of wild-type and *Grk2*<sup>-/-</sup> Flp-In-3T3 cells after 4 h of Shh-N and SAG treatment. The medians with interquartile range of the fluorescence intensities of endogenous Smo are shown, quantified from multiple cilia ( $n = 150$ ). Data were analysed using Kruskal–Wallis non-parametric ANOVA. \*\*\*\* $P < 0.001$  and n.s. (not significant).

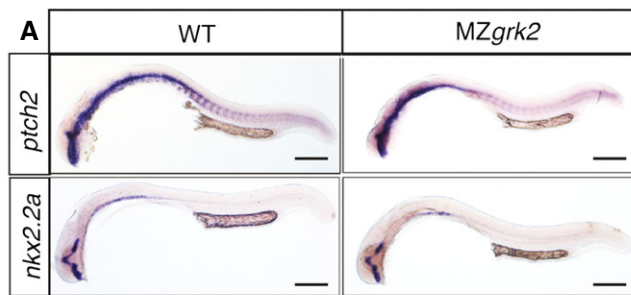

**Figure EV4. MZgrk2 is fully rescued by mRNA encoding Grk2<sup>K220R</sup> and Grk2 domain swapping assay.**

A *In situ* hybridisation of *ptch2* and *nkx2.2a* in 24hpf wild-type (left column) and MZgrk2 embryos expressing Grk2<sup>K220R</sup>-GFP (right column) (*n* = 30 for each sample). Scale bar, 200 μm.

B Prox1a (green) and Eng (red) expression in the myotome of 30hpf MZgrk2 embryos injected with mRNA encoding Grk2<sup>ΔRGS</sup>-GFP, Grk2<sup>Δkinase</sup>-GFP, Grk2<sup>ΔPH</sup>-GFP, Grk2<sup>ΔCmargin</sup>-GFP and Grk2<sup>ΔNmargin</sup>-GFP. Merge images show nuclei labelled with DAPI (blue) (*n* = 20). Scale bar, 50 μm.

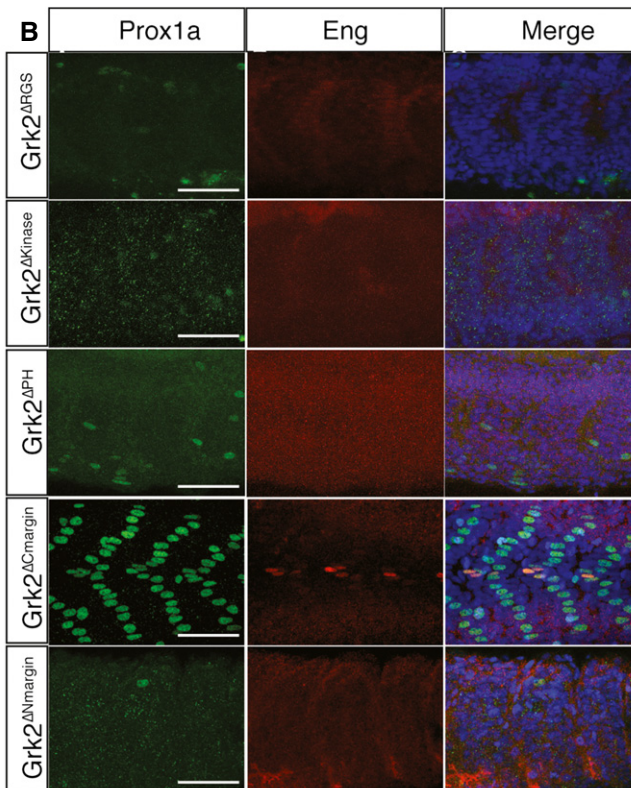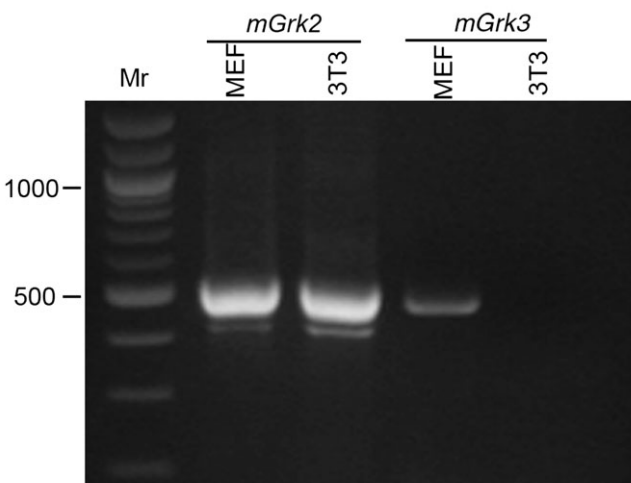

**Figure EV5. Grk3 is not expressed in NIH3T3 cells.**

RT-PCR assay of Grk2 and Grk3 expression in MEF and NIH 3T3 cells.
